# Supplementary material for: A Competition, Benchmark, Code, and Data for Using Artificial Intelligence to Detect Lesions in Digital Breast Tomosynthesis
Source: PubMed Central journal article supplement (PMC9951043; doi:10.1001/jamanetworkopen.2023.0524), 2023-02-23
Supplement: jamanetwopen-e230524-s002.pdf [file jamanetwopen-e230524-s002.pdf]

## Data Sharing Statement

Konz. A Competition, Benchmark, Code and Data for Using Artificial Intelligence to Detect Lesions in Digital Breast Tomosynthesis. *JAMA Netw Open*. Published February 23, 2023. doi:10.1001/jamanetworkopen.2023.0524

### Data

**Data available:** Yes

**Data types:** Data (not involving human participants)

**How to access data:** The validation set and test set prediction data of all submitted algorithms for our challenge, for Phase 1 and Phase 2, are provided at

<https://wiki.cancerimagingarchive.net/pages/viewpage.action?pageId=64685580>.

**When available:** beginning date: 03-23-2022

### Supporting Documents

**Document types:** Statistical/analytic code

**How to access documents:** The code for certain submitted algorithms can be found in Table 2 of the manuscript.

**When available:** beginning date: 12-14-2022

### Additional Information

**Who can access the data:** All data is publicly accessible (no application required; directly downloadable via link).

**Types of analyses:** Code and predictions for submitted algorithms are made available so that future researchers may base their tumor detection model development on this prior research.

**Mechanisms of data availability:** With investigator support.

**Any additional restrictions:** No restrictions; the predictions and code are completed public.
